# Supplementary material for: Genetic Liver-Specific AMPK Activation Protects against Diet-Induced Obesity and NAFLD
Source: PubMed Central journal article supplement — Cell Rep. Author manuscript; Available in PMC 2019 Jan 23. (PMC6344045; doi:10.1016/j.celrep.2018.12.036), 2019-01-02
Supplement: NIHMS1517819-supplement-1.pdf [file NIHMS1517819-supplement-1.pdf]

**Cell Reports, Volume 26**

## **Supplemental Information**

### **Genetic Liver-Specific AMPK Activation**

#### **Protects against Diet-Induced Obesity and NAFLD**

**Daniel Garcia, Kristina Hellberg, Amandine Chaix, Martina Wallace, Sébastien Herzig, Mehmet G. Badur, Terry Lin, Maxim N. Shokhirev, Antonio F.M. Pinto, Debbie S. Ross, Alan Saghatelian, Satchidananda Panda, Lukas E. Dow, Christian M. Metallo, and Reuben J. Shaw**

**A**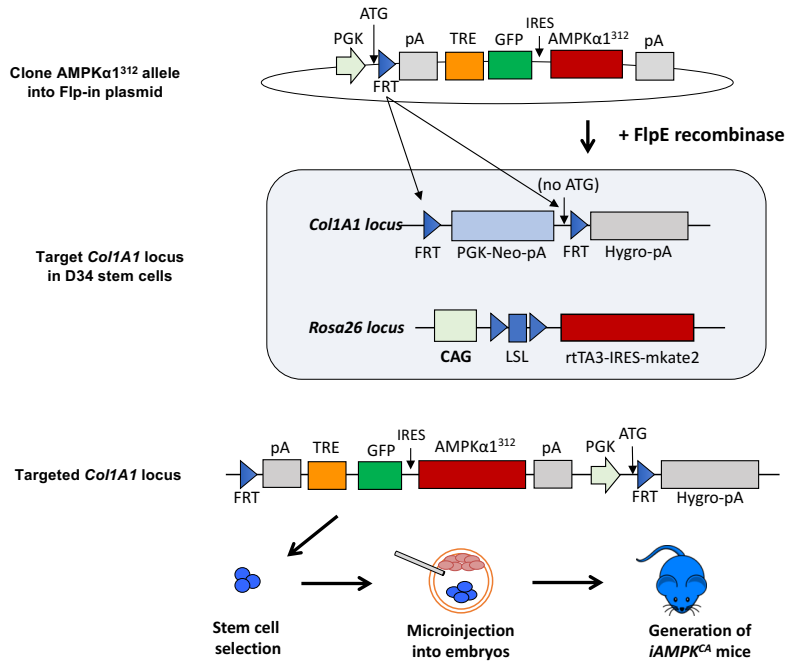**B**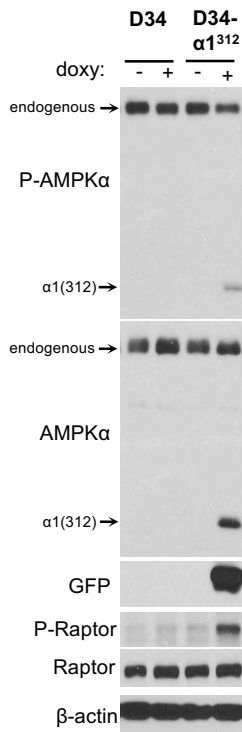**C**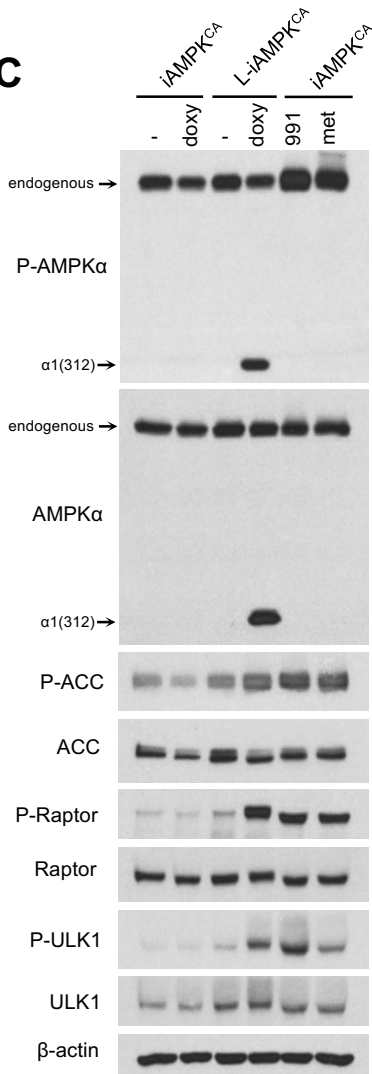

Figure S1

**Figure S1. Generation and validation of iAMPK<sup>CA</sup> mice (related to Fig 1).**

(A) Diagram detailing the cloning strategy for the generation of iAMPK<sup>CA</sup> mice. FRT, Flp recombination target; pA, polyA signal; TRE, tet-response element; GFP, green-fluorescent protein; IRES, internal ribosome entry site; PGK, phosphoglycerate kinase promoter; Hygro<sup>R</sup>, hygromycin resistance gene; CAG, CMV early enhancer chicken  $\beta$ -actin promoter; LSL, loxP-Stop (Neomycin-resistance gene)-loxP cassette; rtTA3, reverse tetracycline-controlled transactivator 3; mkate2, next-generation red-fluorescent protein.

(B) Western blot analysis of the expression of constitutively active AMPK and subsequent AMPK signaling activation in a correctly targeted D34 stem cell clone.

(C) Western blot analysis comparing AMPK activation in primary hepatocytes derived from iAMPK<sup>CA</sup> and L-iAMPK<sup>CA</sup> mice that were treated with or without doxycycline for 4 weeks relative to AMPK activation after one hour treatments of 991 (10  $\mu$ M) or metformin (1 mM).

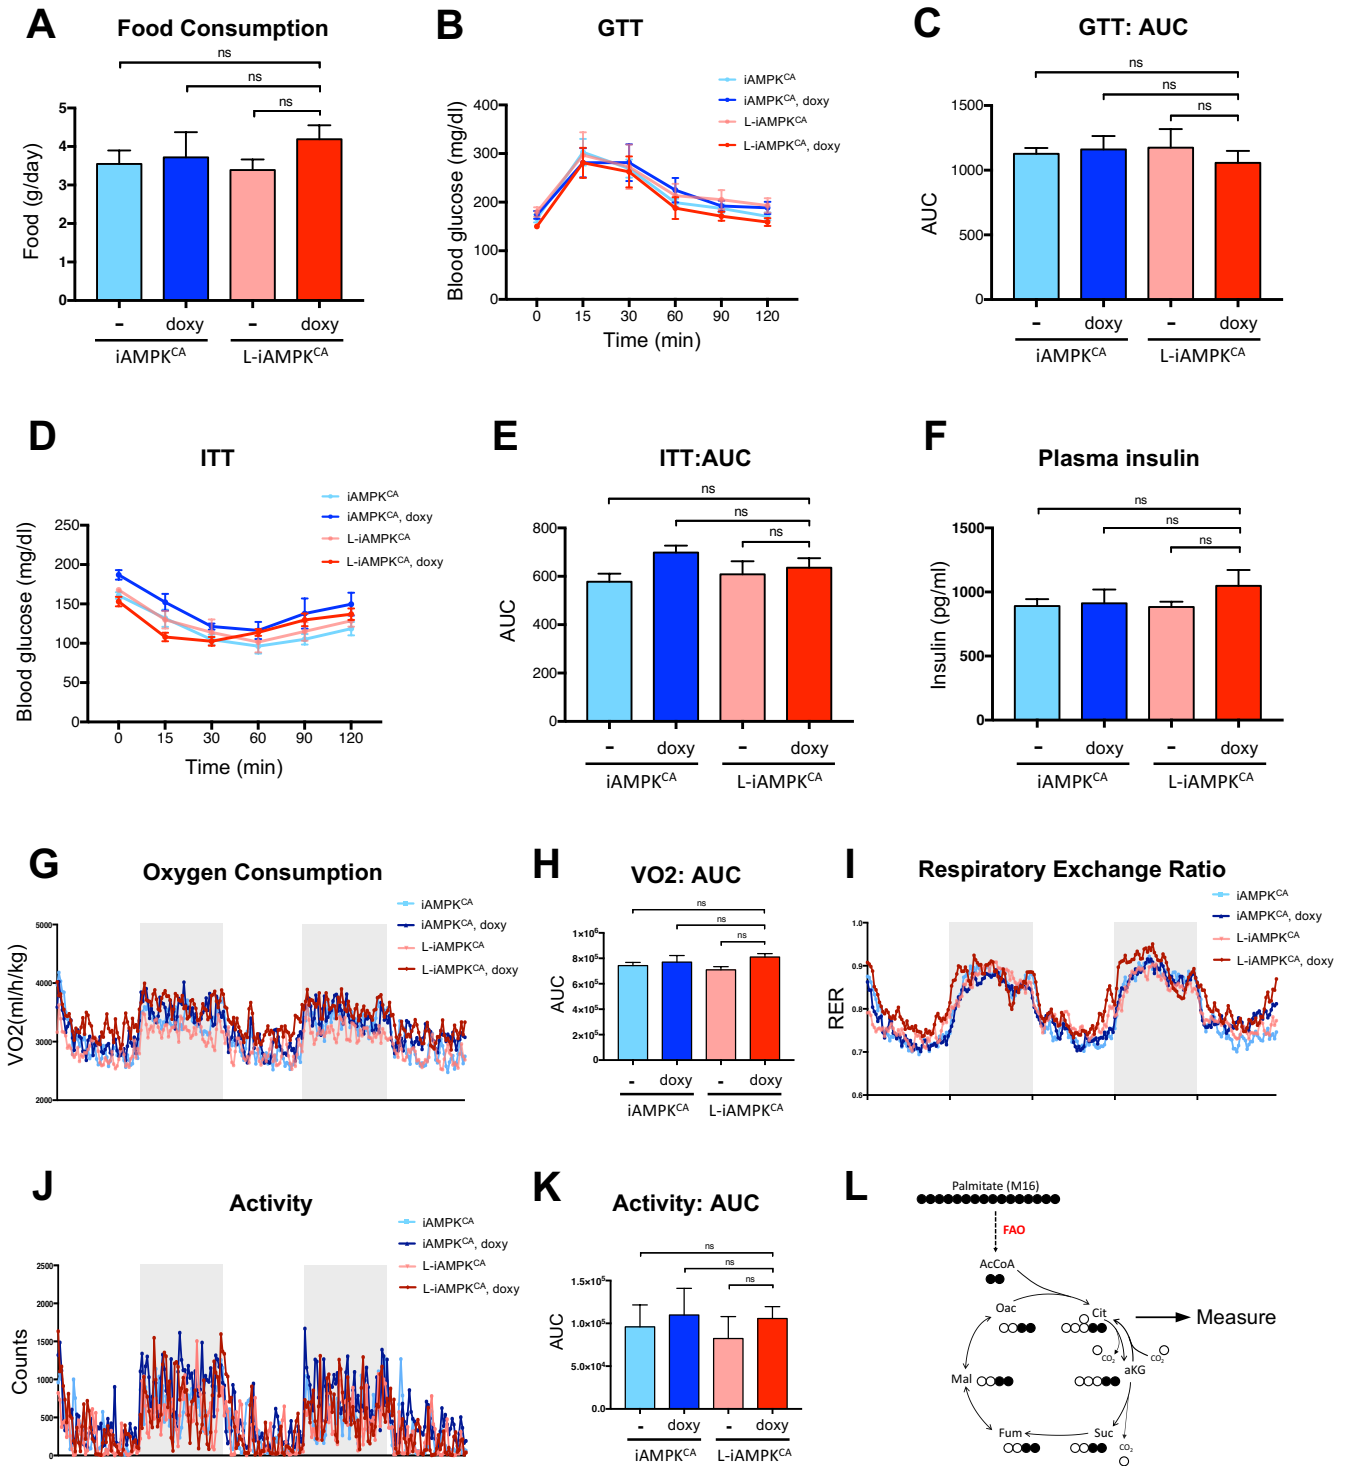

Figure S2



**Figure S2. AMPK activation reduces hepatic lipid levels (related to Fig 2).**

- (A) Food consumption rates in iAMPK<sup>CA</sup> and L-iAMPK<sup>CA</sup> mice fed chow with or without doxycycline.
- (B) Glucose tolerance test (GTT) on iAMPK<sup>CA</sup> and L-iAMPK<sup>CA</sup> mice fed chow with or without doxycycline for 4 weeks. *n*=6 mice per condition.
- (C) Quantification of the area under the curve in (B).
- (D) Insulin tolerance test (ITT) on iAMPK<sup>CA</sup> and L-iAMPK<sup>CA</sup> mice fed chow with or without doxycycline for 4 weeks. *n*=6 mice per condition.
- (E) Quantification of the area under the curve in (D).
- (F) Fasting (6 hours) levels of plasma insulin in iAMPK<sup>CA</sup> and L-iAMPK<sup>CA</sup> mice fed chow with or without doxycycline for 4 weeks. *n*=5 mice per condition.
- (G) Metabolic cage analysis of oxygen consumption (VO<sub>2</sub>) in iAMPK<sup>CA</sup> and L-iAMPK<sup>CA</sup> mice fed chow with or without doxycycline for 4 weeks. Shaded area (light gray) delineates night time (6:00 pm to 6:00 am). *n*=4 mice per condition.
- (H) Quantification of the area under the curve in (G).
- (I) Metabolic cage analysis of the respiratory exchange ratio (RER) in iAMPK<sup>CA</sup> and L-iAMPK<sup>CA</sup> mice fed chow with or without doxycycline for 4 weeks. Shaded area (light gray) delineates night time (6:00 pm to 6:00 am). *n*=4 mice per condition.
- (J) Metabolic cage analysis of the activity of iAMPK<sup>CA</sup> and L-iAMPK<sup>CA</sup> mice fed chow with or without doxycycline for 4 weeks. Shaded area (light gray) delineates night time (6:00 pm to 6:00 am). *n*=4 mice per condition.
- (K) Quantification of the area under the curve in (J).
- (L) Diagram illustrating the trajectory of uniformly labeled palmitate into acetyl-CoA, which subsequently gets incorporated into citrate. Abbreviations: FAO, fatty acid oxidation; AcCoA, acetyl-CoA; Oac, oxaloacetate; Cit, citrate; αKG, alpha-ketoglutarate; Suc, succinate; Fum, fumarate; Mal, malate.
- All values are expressed as means and error bars reflect SEM. Significance determined by ANOVA, ns= not significant.

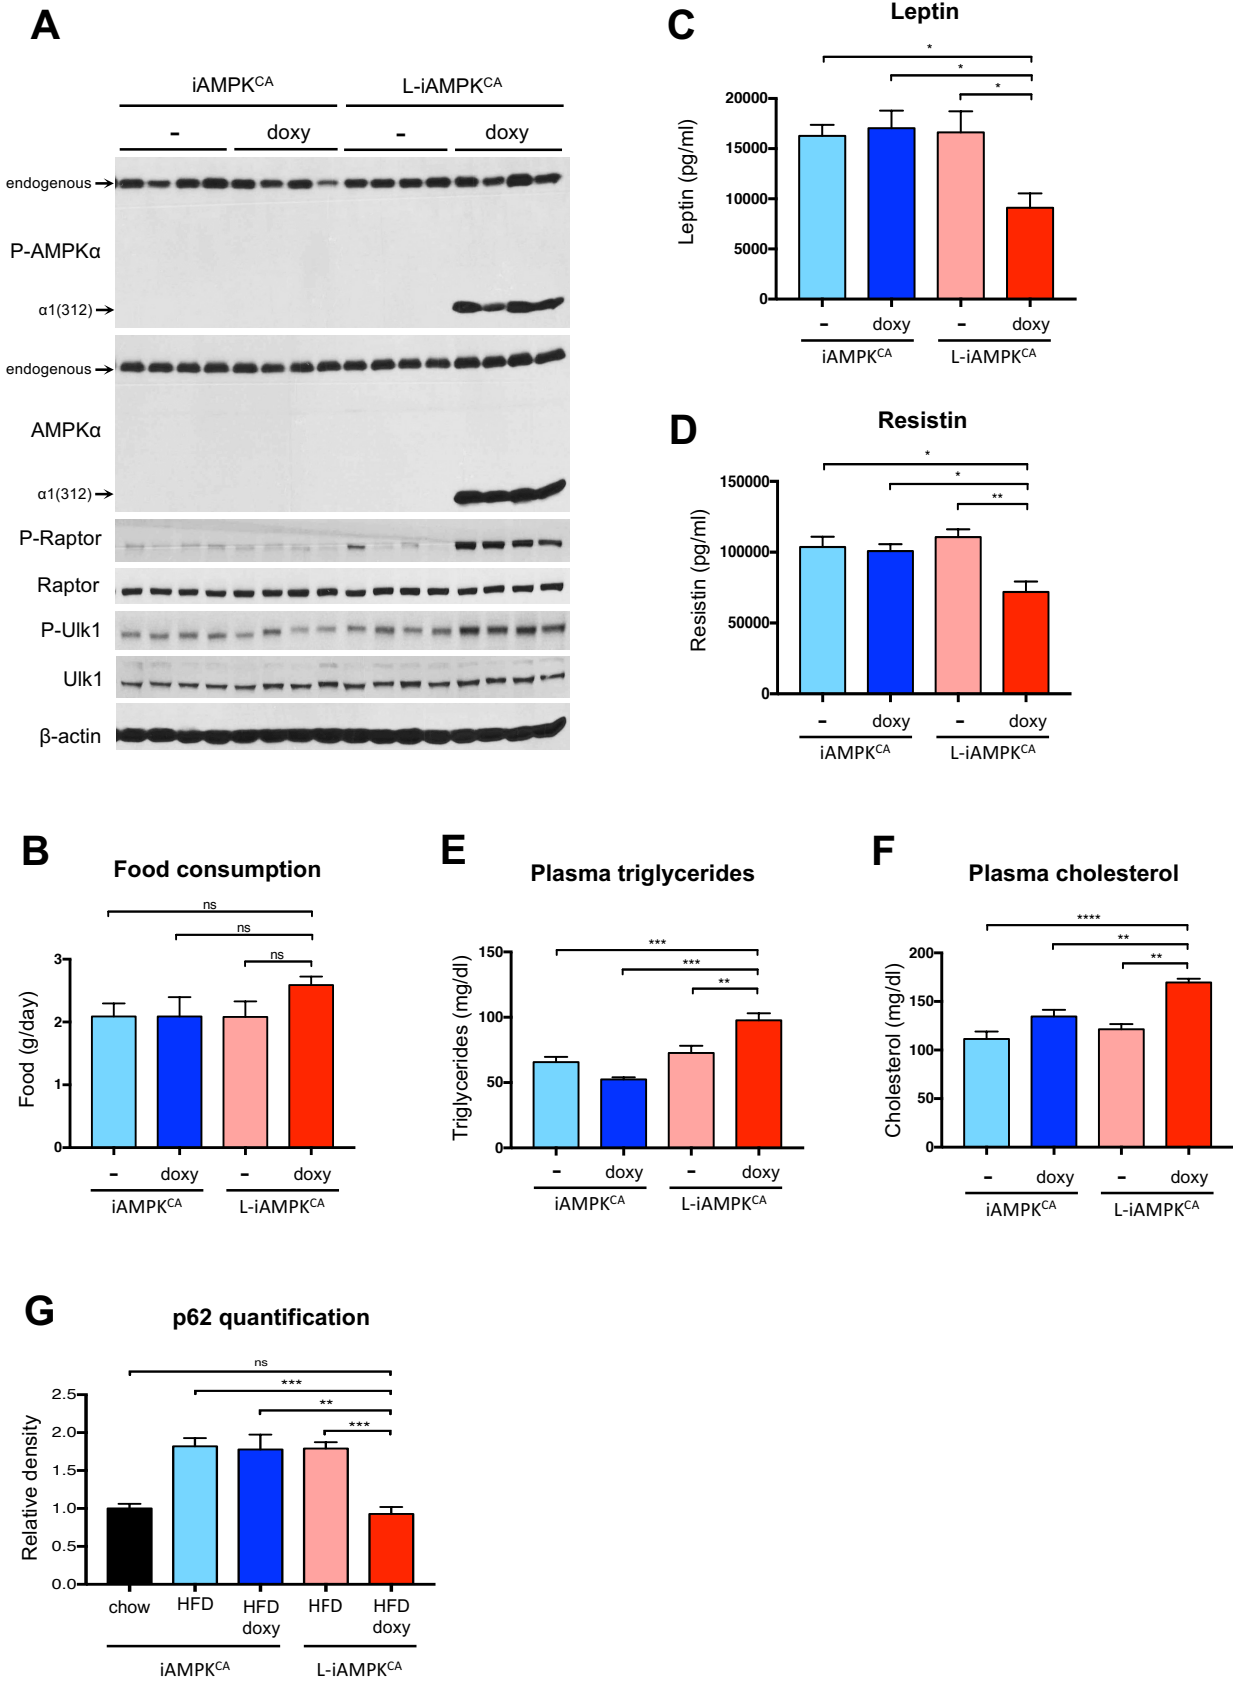

Figure S3

**Figure S3. AMPK activation in liver protects against diet-induced obesity (related to Fig3).**

(A) Western blot analysis of AMPK activation in iAMPK<sup>CA</sup> and L-iAMPK<sup>CA</sup> mice fed HFD with or without doxycycline for 8 weeks. Each lane is a separate mouse.

(B) Food consumption rates in iAMPK<sup>CA</sup> and L-iAMPK<sup>CA</sup> mice fed HFD with or without doxycycline.

(C-D) Fasting plasma levels of adipokines leptin and resistin in iAMPK<sup>CA</sup> and L-iAMPK<sup>CA</sup> mice fed HFD with or without doxycycline for 8 weeks. n=6 mice per condition.

(E-F) Fasting plasma levels of triglycerides and cholesterol in iAMPK<sup>CA</sup> and L-iAMPK<sup>CA</sup> mice fed HFD with or without doxycycline for 8 weeks. n=6 mice per condition.

(G) Densitometry quantification of p62 levels on the western blot shown on Figure 3J.

All values are expressed as means and error bars reflect SEM. Significance determined by ANOVA, \*= p<0.05, \*\*= p<0.01, \*\*\*= p<.001, \*\*\*\*= p<.0001, ns= not significant.

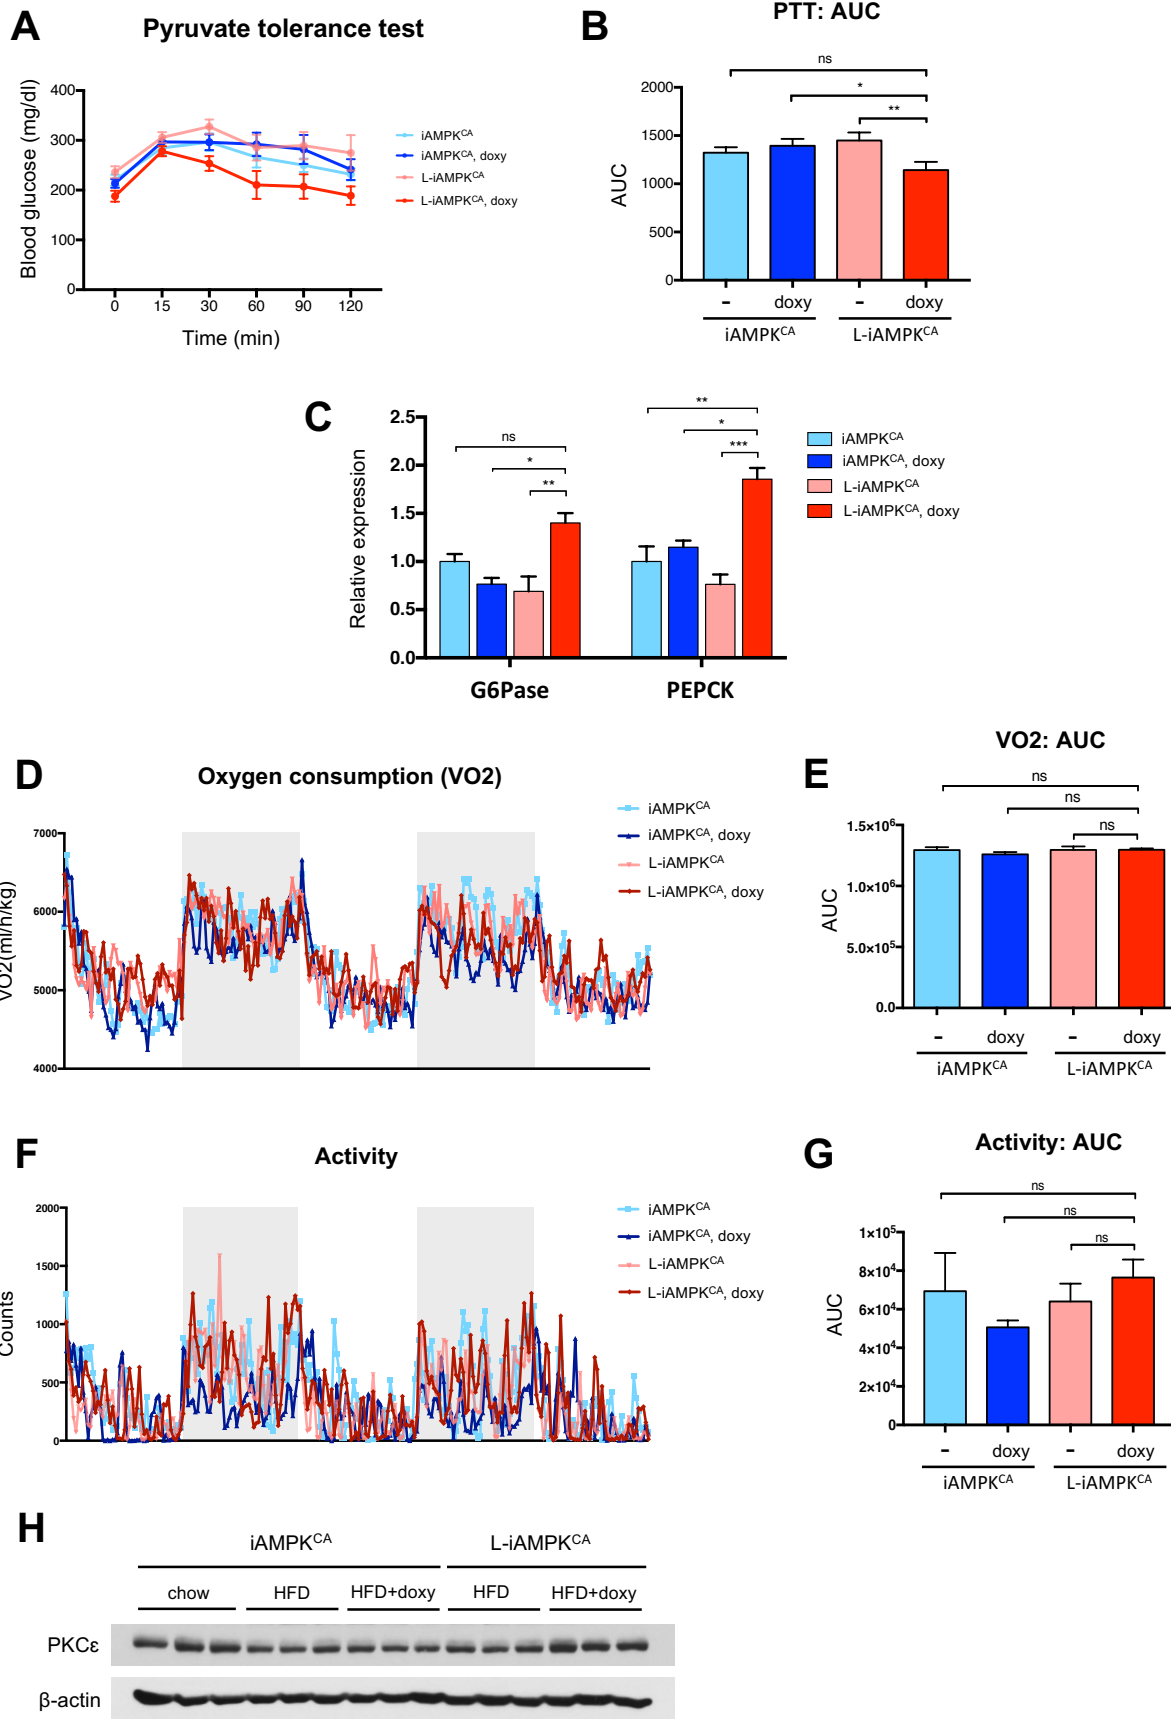

Figure S4

**Figure S4. AMPK activation in liver modestly improves glucose homeostasis in the context of diet-induced obesity (related to Fig 4).**

(A) Pyruvate tolerance test (PTT) on *iAMPK<sup>CA</sup>* and *L-iAMPK<sup>CA</sup>* mice fed a HFD with or without doxycycline for 8 weeks. *n*=6 mice per condition.

(B) Quantification of the area under the curve in (A).

(C) Gene expression analysis (qPCR) of *G6pc* (G6Pase) and *Pck1* (PEPCK) in livers from *iAMPK<sup>CA</sup>* and *L-iAMPK<sup>CA</sup>* mice fed a HFD with or without doxycycline for 8 weeks. *n*=3 mice per condition.

(D) Metabolic cage analysis of oxygen consumption (VO<sub>2</sub>) in *iAMPK<sup>CA</sup>* and *L-iAMPK<sup>CA</sup>* mice fed a HFD with or without doxycycline for 8 weeks. Shaded area (light gray) delineates night time (6:00 pm to 6:00 am). *n*=4 mice per condition.

(E) Quantification of the area under the curve in (D).

(F) Metabolic cage analysis of the activity of *iAMPK<sup>CA</sup>* and *L-iAMPK<sup>CA</sup>* mice fed a HFD with or without doxycycline for 8 weeks. Shaded area (light gray) delineates night time (6:00 pm to 6:00 am). *n*=4 mice per condition.

(G) Quantification of the area under the curve in (F).

(H) Western blot analysis of total PKC $\epsilon$  levels in livers from *iAMPK<sup>CA</sup>* and *L-iAMPK<sup>CA</sup>* mice fed either chow, or HFD with or without doxycycline for 8 weeks. Each lane is a separate mouse.

All values are expressed as means and error bars reflect SEM. Significance determined by ANOVA, \*= *p*<0.05, \*\*=*p*<0.01, \*\*\*=*p*<.001, ns= not significant.

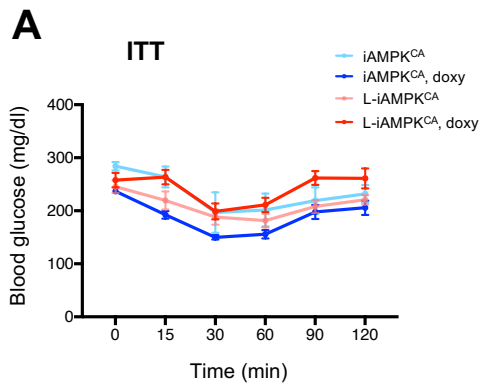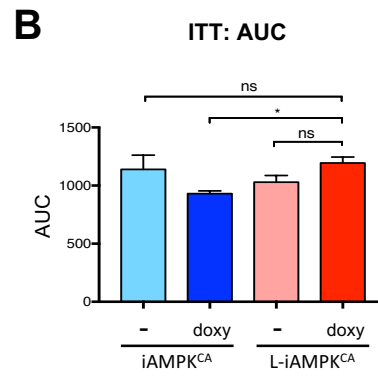

Figure S5

**Figure S5. AMPK activation in liver inhibits progression of established diet-induced obesity (related to Figure 6).**

(A) Insulin tolerance test (ITT) on iAMPK<sup>CA</sup> and L-iAMPK<sup>CA</sup> mice treated as in Figure 6A.  $n=7$  mice per condition.

(B) Quantification of the area under the curve in (A).

All values are expressed as means and error bars reflect SEM. Significance determined by ANOVA, \*=  $p<0.05$ , ns= not significant.

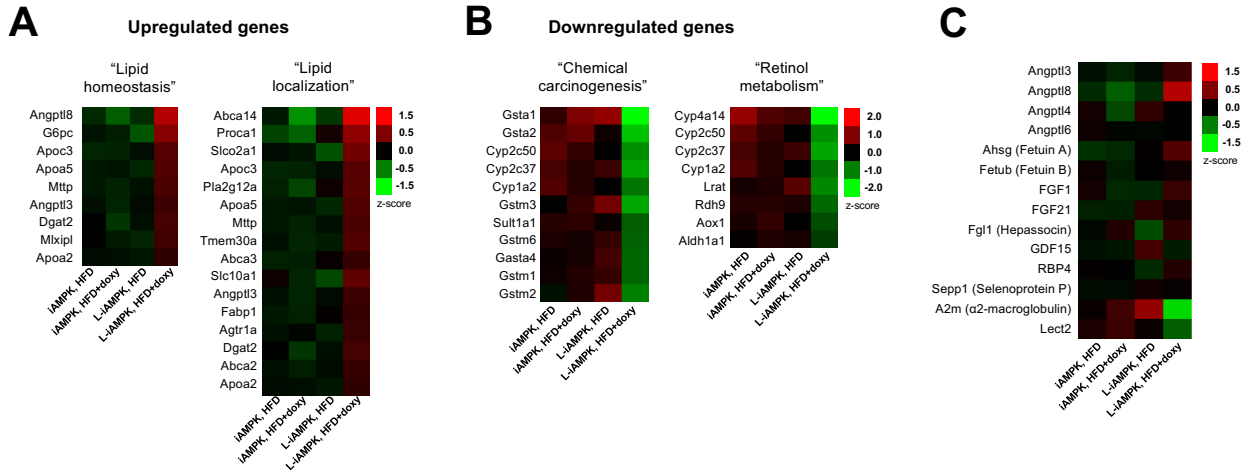

**D**

| Motif | Motif name                                     | q-value (Benjamini) | # targets with motifs |
|-------|------------------------------------------------|---------------------|-----------------------|
|       | ISRE(IRF)/ThioMac-LPS-Expression(GSE23622)     | 0                   | 37                    |
|       | IRF1(IRF)/PBMC-IRF1-ChIP-Seq(GSE43036)         | 0                   | 44                    |
|       | IRF2(IRF)/Erythroblas-IRF2-ChIP-Seq(GSE36985)  | 0                   | 36                    |
|       | PU.1:IRF8(ETS:IRF)/pDC-Irf8-ChIP-Seq(GSE66899) | 0                   | 43                    |
|       | Atf3(bZIP)/GBM-ATF3-ChIP-Seq(GSE33912)         | 0                   | 70                    |
|       | Fra1(bZIP)/BT549-Fra1-ChIP-Seq(GSE46166)       | 0                   | 60                    |
|       | BATF(bZIP)/Th17-BATF-ChIP-Seq(GSE39756)        | 0.0001              | 67                    |
|       | Fosl2(bZIP)/3T3L1-Fosl2-ChIP-Seq(GSE56872)     | 0.0003              | 43                    |
|       | AP-1(bZIP)/ThioMac-PU.1-ChIP-Seq(GSE21512)     | 0.0005              | 71                    |

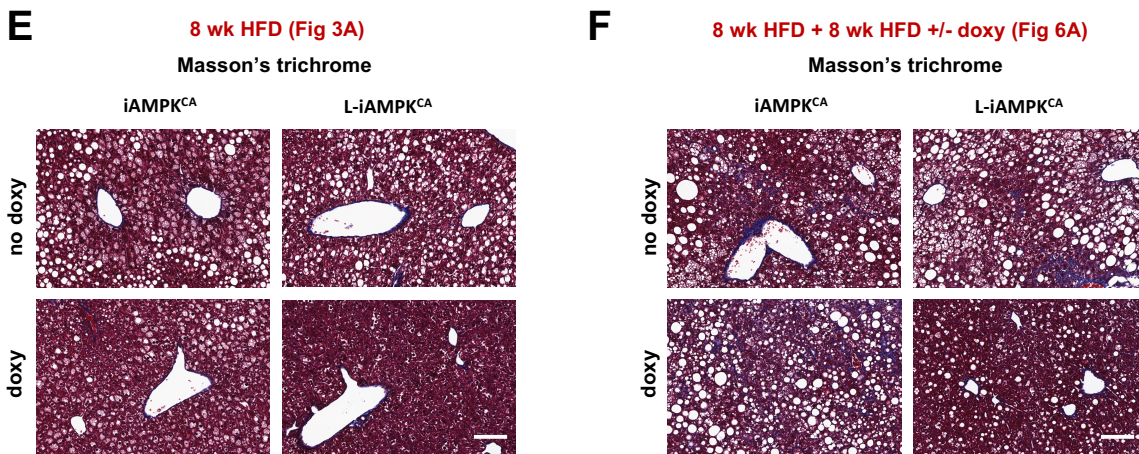

Figure S6



**Figure S6. AMPK activation downregulates inflammation and fibrosis-related transcriptional programs (related to Figure 7).**

(A) Heat maps showing upregulated genes in the terms “Lipid homeostasis” and “Lipid localization” from Metascape pathway analysis in Figure 7C.

(B) Heat maps showing downregulated genes in the terms “Chemical carcinogenesis” and “Retinol metabolism” from Metascape pathway analysis in Figure 7D.

(C) Heat map showing the expression profile of several known hepatokines in mice fed 8 weeks HFD, plus or minus doxycycline (from RNA seq data).

(D) Regulatory transcriptional motifs enriched in genes downregulated in doxycycline-treated L-iAMPK<sup>CA</sup> mice versus doxycycline-treated iAMPK<sup>CA</sup> mice (8 weeks HFD), identified using motif enrichment analysis.

(E) Representative images of Masson trichrome staining on livers from iAMPK<sup>CA</sup> and L-iAMPK<sup>CA</sup> mice fed 8 weeks HFD, plus or minus doxycycline (Protection study, Figure 3A). Collagen fibers are stained blue. Scale bar = 100 μM.

(F) Representative images of Masson trichrome staining on livers from iAMPK<sup>CA</sup> and L-iAMPK<sup>CA</sup> mice fed 8 weeks HFD and then an additional 8 weeks of HFD, plus or minus doxycycline (Intervention study, Figure 6A). Collagen fibers are stained blue. Scale bar = 100 μM.
